# Supplementary material for: Precise control of alloying sites of bimetallic nanoclusters via surface motif exchange reaction
Source: PubMed Central journal article supplement (PMC5691201; doi:10.1038/s41467-017-01736-5), 2017-11-16
Supplement: 41467_2017_1736_MOESM1_ESM.pdf [file 41467_2017_1736_MOESM1_ESM.pdf]

## Supplementary Note 1. Characterization of as-synthesized $[\text{Ag}_{44}(\text{SR})_{30}]^{4-}$ nanoclusters (NCs).

UV-vis absorption spectrum of the as-prepared Ag NCs shows several characteristic absorption features of the reported  $[\text{Ag}_{44}(\text{SR})_{30}]^{4-}$  NCs (SR denotes thiolate ligand) at 415, 485, 535, 645, and 835 nm (Fig. 1a)<sup>1</sup>, which also suggests good yield (~90% on Ag atom basis, determined by inductively coupled plasma optical emission spectroscopy, ICP-OES) and high purity of the as-prepared  $[\text{Ag}_{44}(p\text{-MBA})_{30}]^{4-}$  in our protocol. To further assess the purity of as-prepared  $[\text{Ag}_{44}(p\text{-MBA})_{30}]^{4-}$  NCs, we analyzed our samples by polyacrylamide gel electrophoresis (PAGE) and electrospray ionization mass spectrometry (ESI-MS). As shown in Fig. 1a (left inset), the PAGE result shows 4 bands, where the most prominent band (Band 4) corresponds to  $[\text{Ag}_{44}(p\text{-MBA})_{30}]^{4-}$ , and the other three bands (Bands 1-3) could be attributed to the impurities generated during the running of PAGE analysis, which is consistent with a previous report<sup>2</sup>. ESI-MS spectrum (Fig. 1b) shows two dominant peaks at  $m/z$  of ~2335 and ~2975 in a broad  $m/z$  range of 1000–4000, which should be assigned to  $[\text{Ag}_{44}(p\text{-MBA})_{30}]^{4-}$  cluster ion and a fragment ion of  $[\text{Ag}_{43}(p\text{-MBA})_{28}]^{3-}$ , respectively. The good accuracy of our assignment can be exemplified by the perfect match of the experimental and calculated isotope patterns of  $[\text{Ag}_{44}(p\text{-MBA})_{30}]^{4-}$  (Fig. 1b, left inset). It should be noted that our PAGE results and ESI-MS spectrum are identical to those of the reported pure  $[\text{Ag}_{44}(p\text{-MBA})_{30}]^{4-}$  NCs<sup>2</sup>.

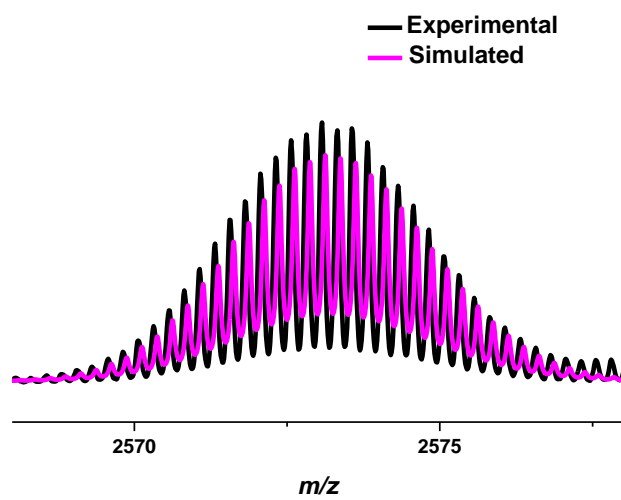

**Supplementary Figure 1.** Experimental (black line) and simulated (magenta line) isotope patterns of  $[\text{Ag}_{32}\text{Au}_{12}(\text{SR})_{29}\text{Cl}]^{4-}$ , where SR denotes thiolate ligand.

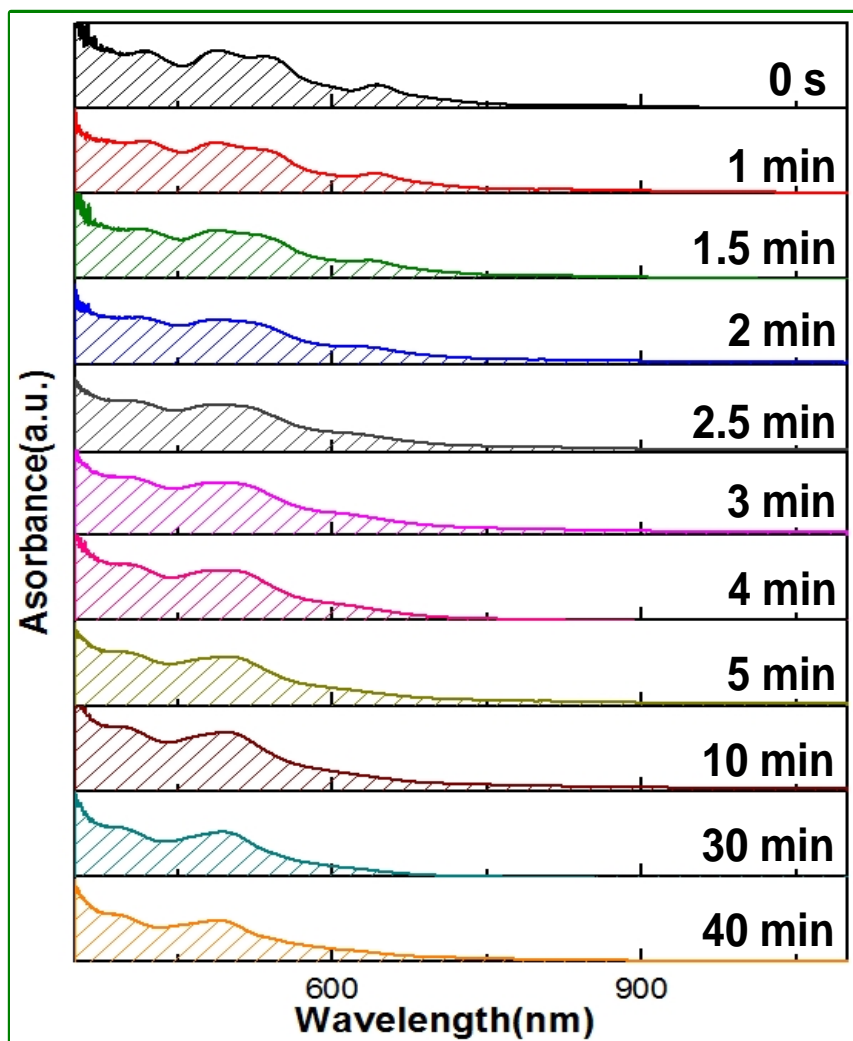

**Supplementary Figure 2.** Time-evolution ultraviolet-visible absorption spectra of reaction mixture from  $[Ag_{44}(SR)_{30}]^{4+}$  to  $[Ag_{32}Au_{12}L_{30}]^{4+}$  nanoclusters (L = SR or Cl).

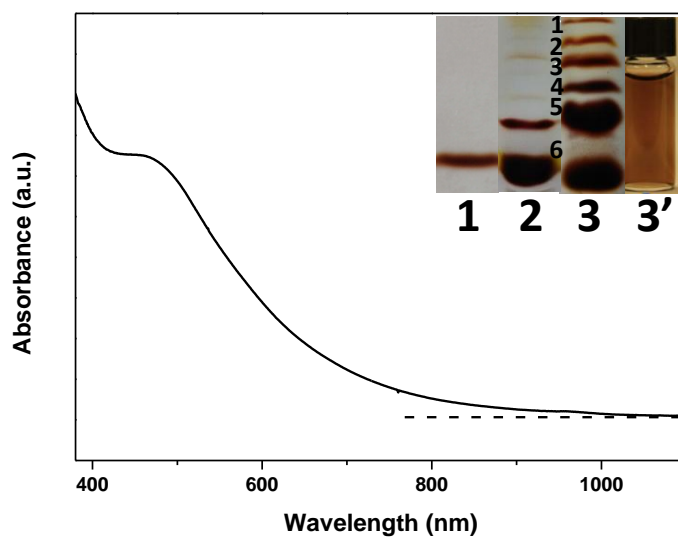

**Supplementary Figure 3.** Ultraviolet-visible absorption spectrum of AgAu nanoclusters formed by reacting  $[\text{Ag}_{44}(\text{SR})_{30}]^{4-}$  with Au(III) salts (i.e.,  $\text{HAuCl}_4$ ). The zero absorbance is indicated by the dotted line. Insets 3 and 3' are polyacrylamide gel electrophoresis result and digital photo of the as-formed AgAu nanoclusters. For comparison purpose, the polyacrylamide gel electrophoresis results of  $[\text{Ag}_{32}\text{Au}_{12}\text{L}_{30}]^{4-}$  and  $[\text{Ag}_{44}(\text{SR})_{30}]^{4-}$  are shown as insets 1 and 2, respectively.

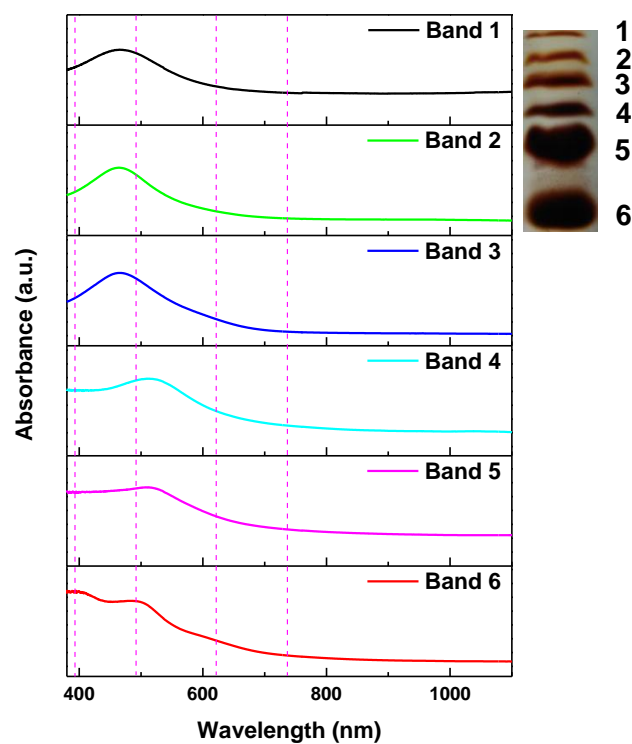

**Supplementary Figure 4.** Ultraviolet-visible absorption spectra of Bands 1–6 identified in the polyacrylamide gel electrophoresis gel (inset) of cluster mixture formed by reacting  $[\text{Ag}_{44}(\text{SR})_{30}]^{4-}$  with  $\text{HAuCl}_4$ . The dotted lines indicate the absorption features of  $[\text{Ag}_{32}\text{Au}_{12}\text{L}_{30}]^{4-}$  at 390, 490, 620, and 735 nm.

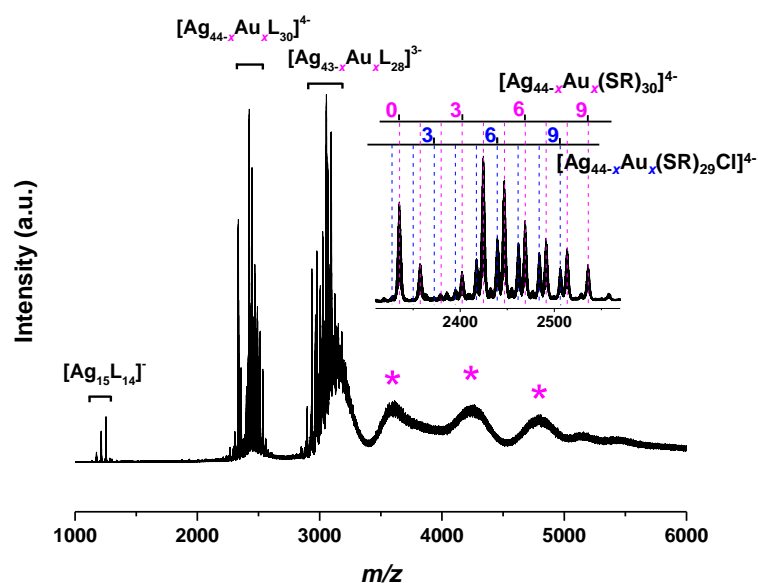

**Supplementary Figure 5.** Electrospray ionization mass spectrum of AgAu nanoclusters formed by reacting  $[\text{Ag}_{44}(\text{SR})_{30}]^{4-}$  with Au(III) salts (i.e.,  $\text{HAuCl}_4$ ). The inset shows zoom-in spectrum of  $[\text{Ag}_{44-x}\text{Au}_x\text{L}_{30}]^{4-}$  ( $\text{L} = \text{SR}$  or  $\text{Cl}$ ) peaks. The  $[\text{Ag}_{43-x}\text{Au}_x\text{L}_{28}]^{3-}$  is a common fragment of  $[\text{Ag}_{44-x}\text{Au}_x\text{L}_{30}]^{4-}$ , similar to the fragment ion of  $[\text{Ag}_{43}\text{L}_{28}]^{4-}$  observed in mass spectrum of  $[\text{Ag}_{44}\text{L}_{30}]^{4-}$  (Fig. 1b in main text). The asterisk peaks correspond to nanoclusters with larger sizes, whose accurate formula could not be deduced due to a lack of isotope resolution.

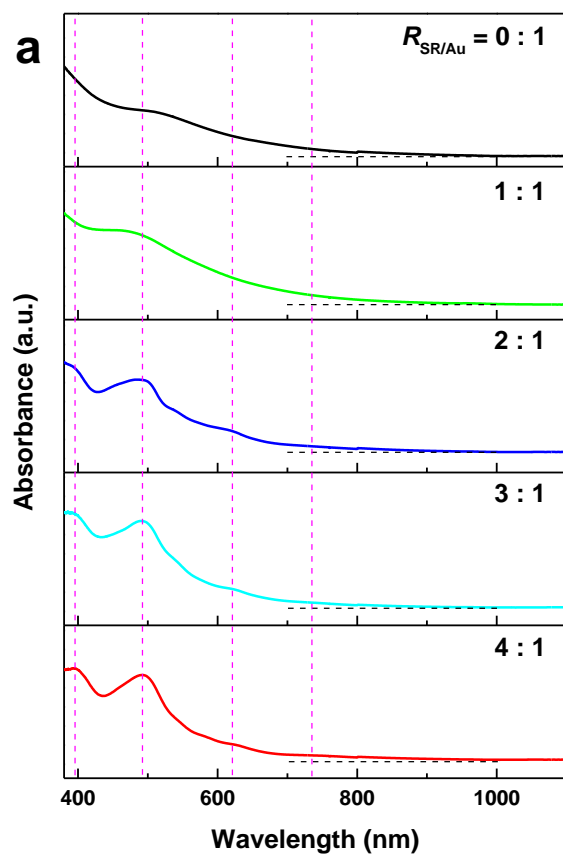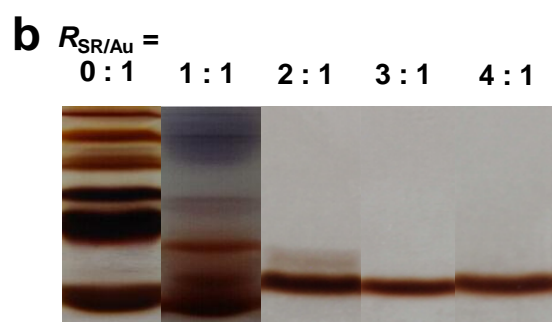

**Supplementary Figure 6.** (a) Ultraviolet-visible absorption spectra and (b) polyacrylamide gel electrophoresis results of AgAu nanoclusters formed by reacting  $[\text{Ag}_{44}(\text{SR})_{30}]^{4+}$  with Au(I)-SR complexes prepared by varied thiol-to-Au ratios,  $R_{\text{SR}/\text{Au}}$ . The dotted drop lines in (a) serve as visual guide for characteristic absorptions of  $[\text{Ag}_{32}\text{Au}_{12}\text{L}_{30}]^{4+}$  NCs.

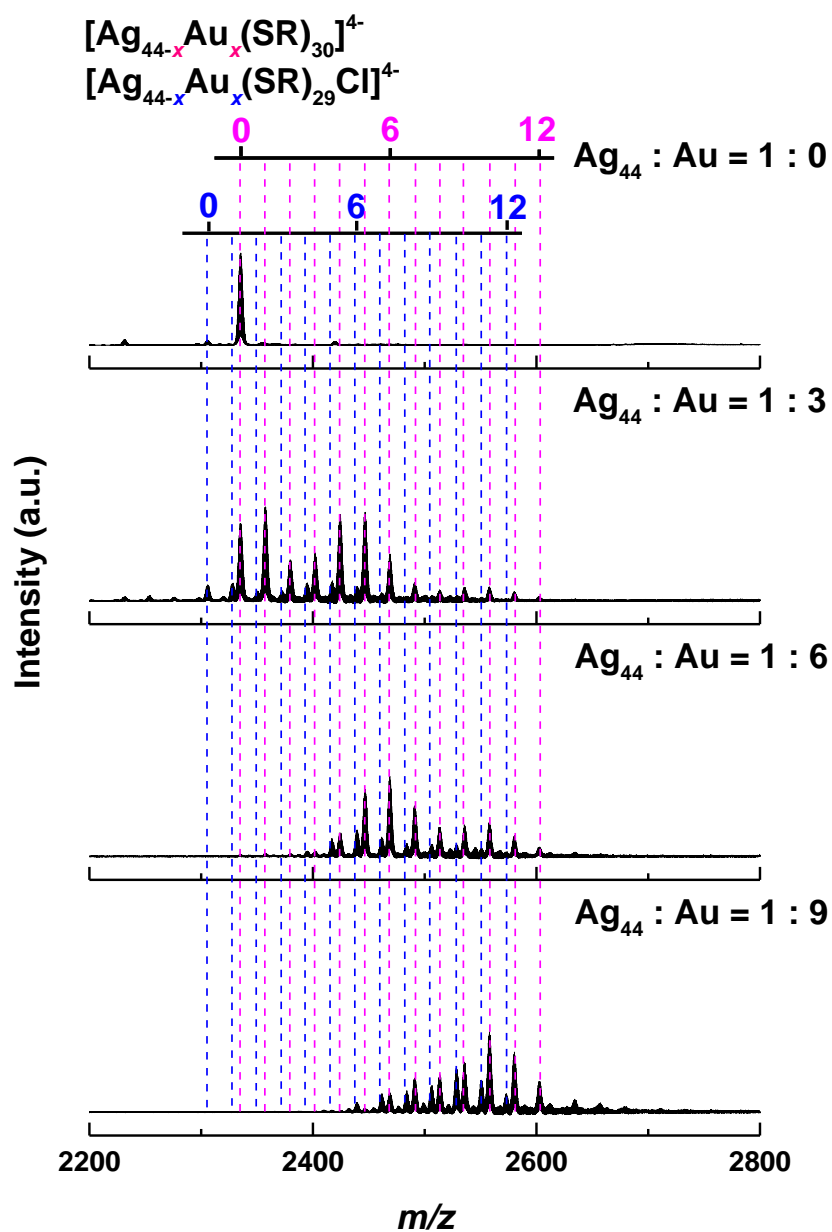

**Supplementary Figure 7.** Zoom-in electrospray ionization mass spectra of  $[Ag_{44-x}Au_xL_{30}]^{4-}$  NCs synthesized at varied  $R_{Ag44/Au(I)}$  ranging from 1:0 to 1:9.



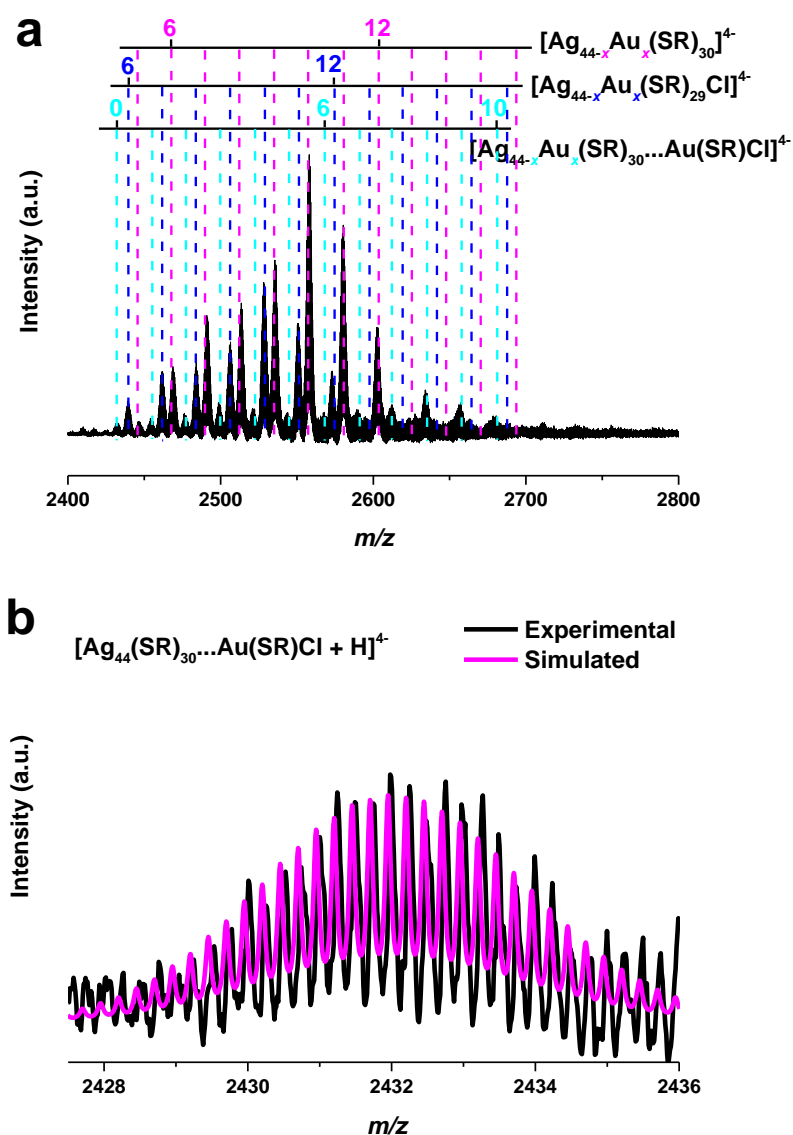

**Supplementary Figure 8.** (a) Zoom-in electro spray ionization mass spectrum of  $[\text{Ag}_{44-x}\text{Au}_x\text{L}_{30}]^{4-}$  nanoclusters synthesized at  $R_{\text{Ag}44/\text{Au}(I)} = 1:9$ , where peaks with mass higher than that of  $[\text{Ag}_{32}\text{Au}_{12}(\text{SR})_{30}]^{4-}$  could be attributed to  $[\text{Au}(\text{SR})\text{Cl}]^-$ -associated  $[\text{Ag}_{44-x}\text{Au}_x(\text{SR})_{30}]^{4-}$  ( $x = 0-10$ ;  $[\text{Ag}_{44-x}\text{Au}_x(\text{SR})_{30} \cdots \text{Au}(\text{SR})\text{Cl} + \text{H}]^{4-}$ ). (b) Experimental (black line) and simulated (magenta line) isotope patterns of  $[\text{Ag}_{44}(\text{SR})_{30} \cdots \text{Au}(\text{SR})\text{Cl} + \text{H}]^{4-}$ .

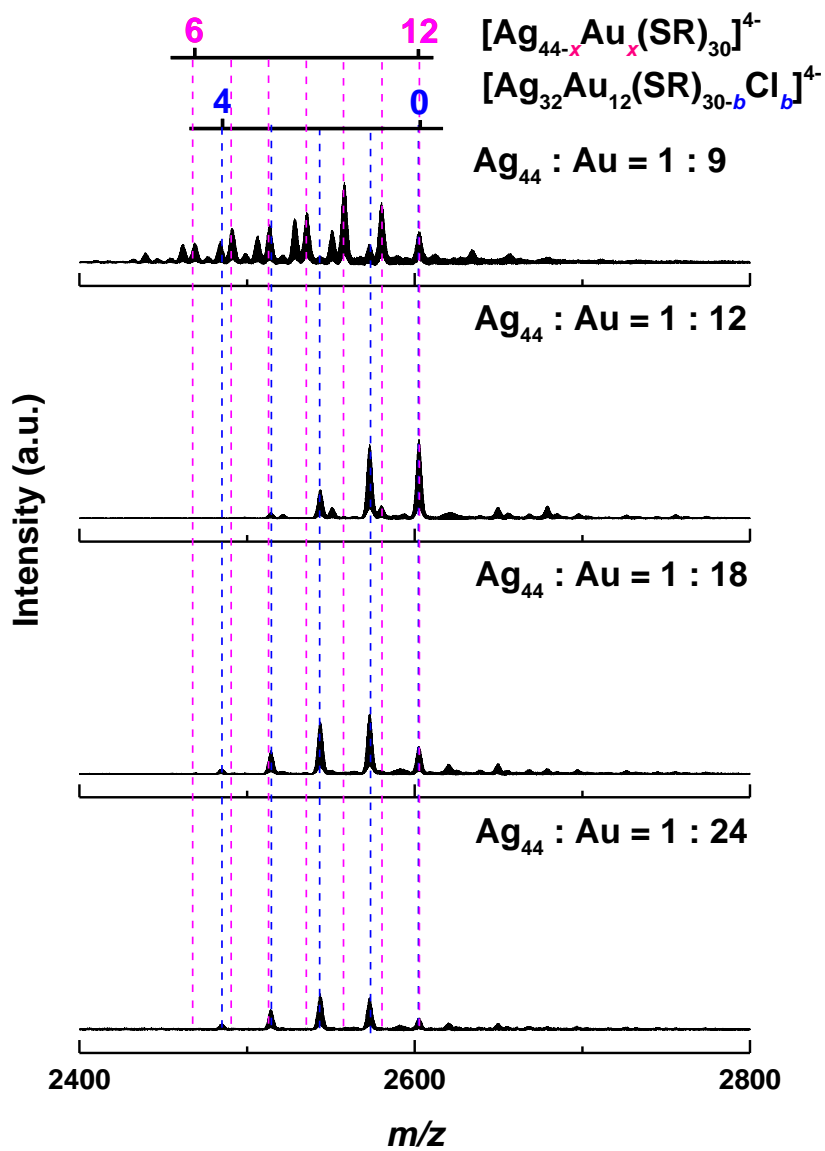

**Supplementary Figure 9.** Zoom-in electrospray ionization mass spectra of  $[Ag_{44-x}Au_xL_{30}]^{4-}$  nanoclusters synthesized at varied  $R_{Ag44/Au(I)}$  ranging from 1:9 to 1:24.

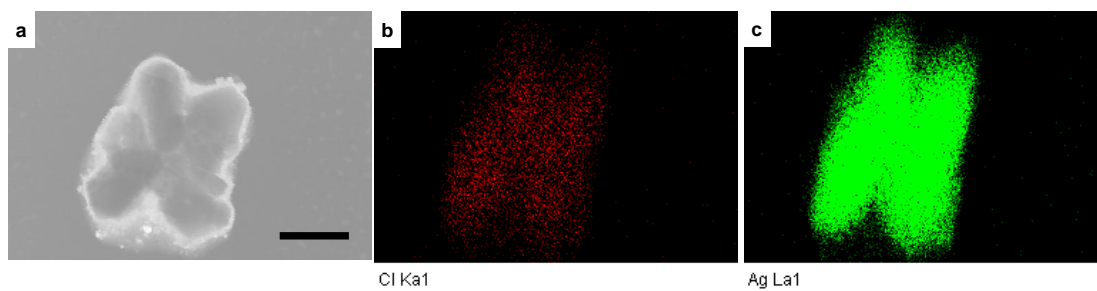

**Supplementary Figure 10.** (a) Scanning transmission electron microscopy (STEM) image and (b, c) energy dispersive X-ray (EDX) elemental maps in terms of (b) Cl and (c) Ag of the by-product AgCl formed in the alloying reaction. The scale bar is 10 nm.

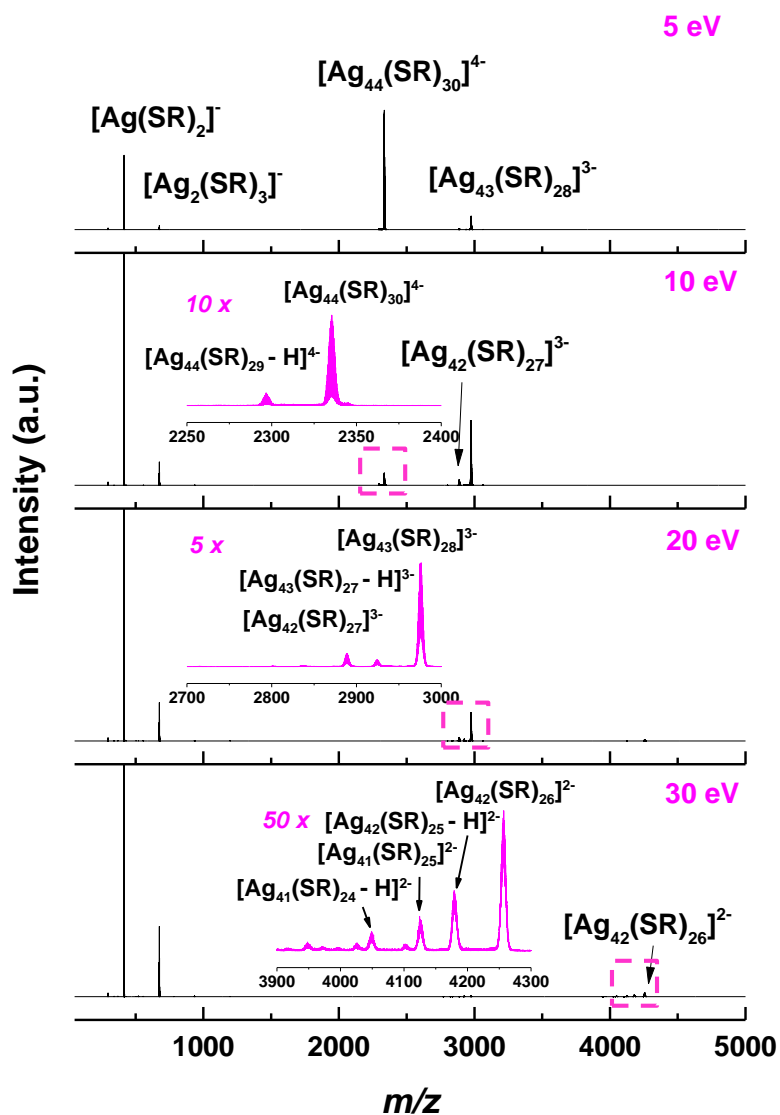

**Supplementary Figure 11.** Tandem mass spectra of  $[\text{Ag}_{44}(\text{SR})_{30}]^{4-}$  ion centered at  $m/z = 2335$  obtained at varied collision energies. Insets are zoom-in spectra of the boxed area in corresponding panel.

## Supplementary Note 2. Fragmentation habit of $[\text{Ag}_{44}(\text{SR})_{30}]^{4-}$ NCs.

As illustrated in Supplementary Fig. 12 below, the fragmentation of  $[\text{Ag}_{44}(\text{SR})_{30}]^{4-}$  in tandem MS analysis follows a stripping-off mechanism, where the fragment ions are developed from their parent ions via successive dissociation of single negatively charged  $[\text{SR}]^-$  (orange arrows),  $[\text{Ag}(\text{SR})_2]^-$  (blue arrows), and  $[\text{Ag}_2(\text{SR})_3]^-$  (purple arrows). Specifically, the 1<sup>st</sup> generation fragment cluster ions (i.e.,  $[\text{Ag}_{44}(\text{SR})_{29} - \text{H}]^{4-}$ ,  $[\text{Ag}_{43}(\text{SR})_{28}]^{3-}$ , and  $[\text{Ag}_{42}(\text{SR})_{27}]^{3-}$ ) are developed at low collision energy (e.g., 5 and 10 eV, Supplementary Fig. 11) by dissociation of the aforementioned single negatively charged species from parent cluster ions (i.e.,  $[\text{Ag}_{44}(\text{SR})_{30}]^{4-}$ ). Further increasing the collision energy (e.g., 20 and 30 eV, Supplementary Fig. 11) could lead to fragmentation of the 1<sup>st</sup> generation fragment cluster ions by dissociation of identical single negatively charged species, yielding the 2<sup>nd</sup> generation fragment cluster ions (i.e.,  $[\text{Ag}_{43}(\text{SR})_{27} - \text{H}]^{3-}$ ,  $[\text{Ag}_{42}(\text{SR})_{26}]^{2-}$ , and  $[\text{Ag}_{41}(\text{SR})_{25}]^{2-}$ ). At an extreme collision energy (e.g., 30 eV, Supplementary Fig. 11), the 3<sup>rd</sup> generation fragment cluster ions (i.e.,  $[\text{Ag}_{42}(\text{SR})_{25} - \text{H}]^{2-}$  and  $[\text{Ag}_{41}(\text{SR})_{24} - \text{H}]^{2-}$ ), which are most probably formed by dissociation of the aforementioned single negatively charged species from the 2<sup>nd</sup> generation fragment ions, could also be observed. It should be noted that a stepwise downgrade of net charge by 1 electron ( $e^-$ ) was recorded when the generation count of fragment cluster ions was increased by 1, which is in good agreement with the proposed stripping-off mechanism by successive dissociation of single negatively charged species.

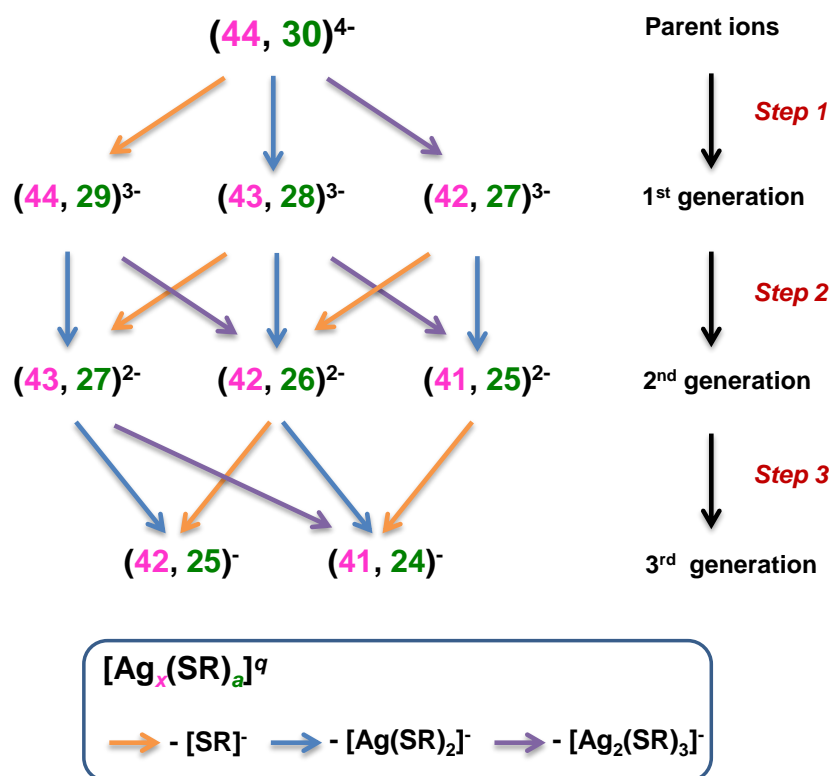

**Supplementary Figure 12.** Schematic illustration of fragmentation process of  $[\text{Ag}_{44}(\text{SR})_{30}]^{4-}$  ions in tandem mass spectrometry analysis, where  $[\text{Ag}_x(\text{SR})_y]^q$  is referred to as  $(x, y)^q$  for clarity.

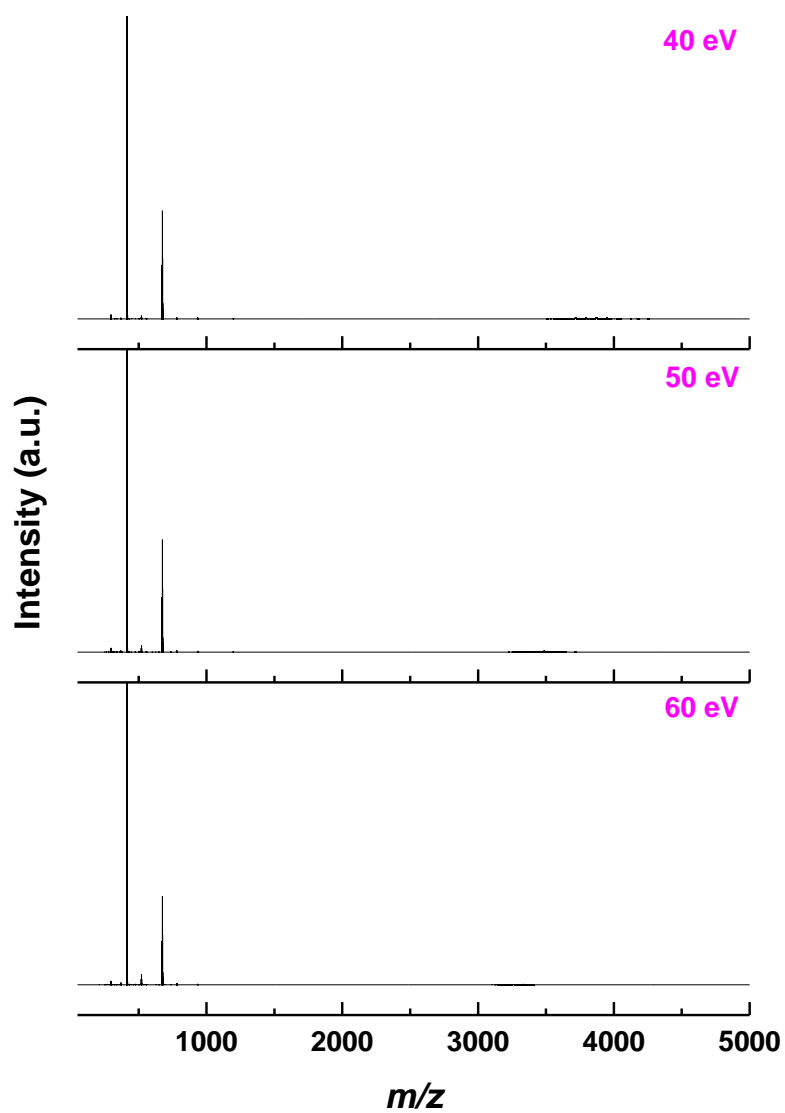

**Supplementary Figure 13.** Tandem mass spectra of  $[\text{Ag}_{44}(\text{SR})_{30}]^{4-}$  ion centered at  $m/z = 2335$  obtained at collision energies higher than 30 eV.

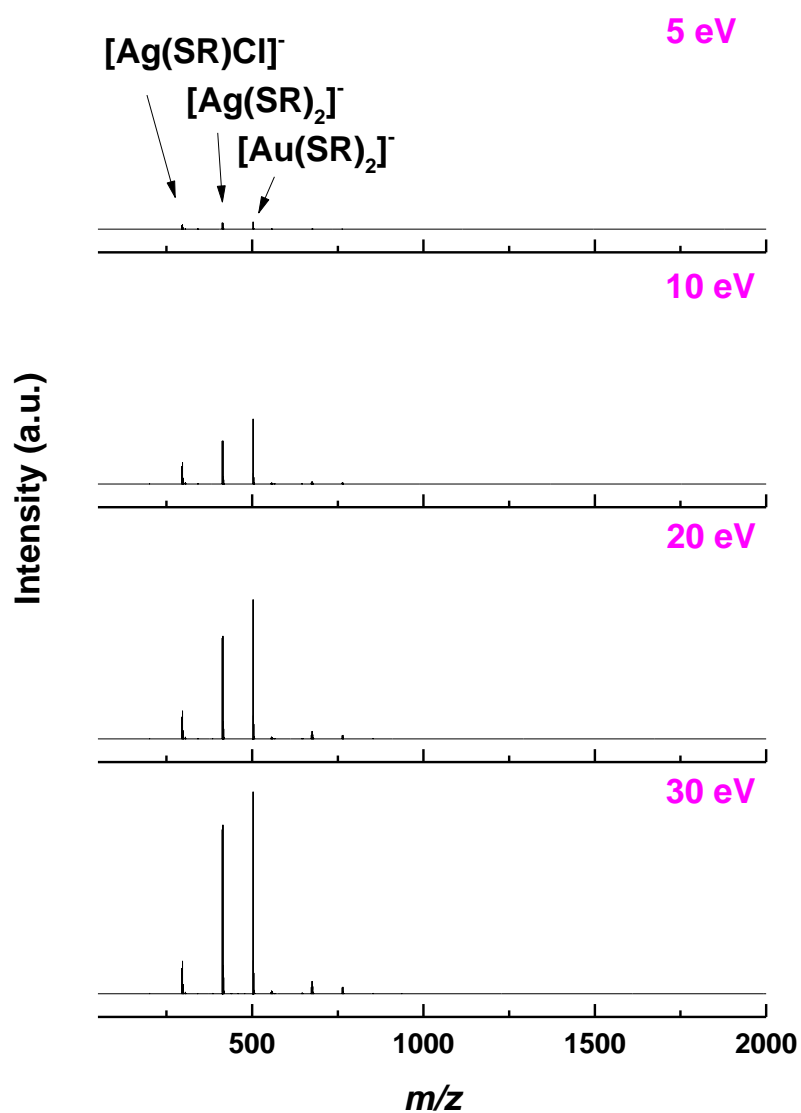

**Supplementary Figure 14.** Tandem mass spectra in  $m/z = 50\text{--}2000$  of  $[\text{Ag}_{34}\text{Au}_{10}\text{L}_{30}]^{4+}$  and  $[\text{Ag}_{33}\text{Au}_{11}\text{L}_{30}]^{4+}$  (marginal) ions. Collision energies are highlighted in magenta in each panel. With increasing collision energies, the abundance of single negatively charged species  $[\text{Ag}(\text{SR})\text{Cl}]^-$ ,  $[\text{Ag}(\text{SR})_2]^-$ , and  $[\text{Au}(\text{SR})_2]^-$  increases, corroborating the stripping-off fragmentation mechanism by dissociation of these species.



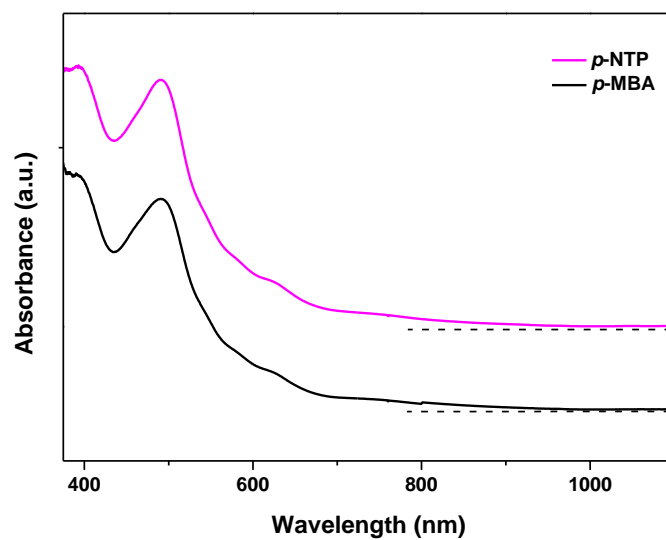

**Supplementary Figure 15.** Ultraviolet-visible absorption spectra of  $[\text{Ag}_{44-x}\text{Au}_x(\text{SR})_{30}]^{4-}$  nanoclusters prepared by reacting  $[\text{Ag}_{44}(\text{p-MBA})_{30}]^{4-}$  with Au(I)-(p-NTP) (magenta line, p-NTP = *para*-nitrothiophenol) and Au(I)-(p-MBA) (black line, p-MBA = *para*-mercaptobenzoic acid) complexes, respectively. Zero absorbance is indicated by dotted lines.

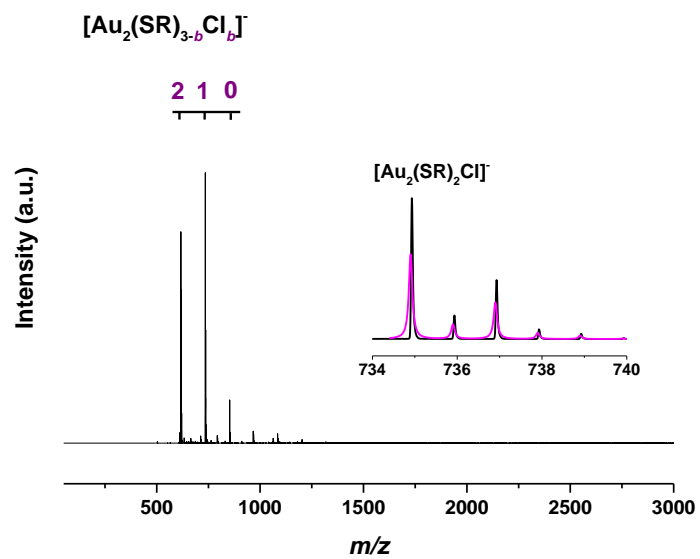

**Supplementary Figure 16.** Electrospray ionization mass spectrum of Au(I)-SR complexes used in surface motif exchange reaction. The inset shows experimental (black line) and simulated (magenta line) isotope patterns of  $[\text{Au}_2(\text{SR})_2 \text{Cl}]^-$ .

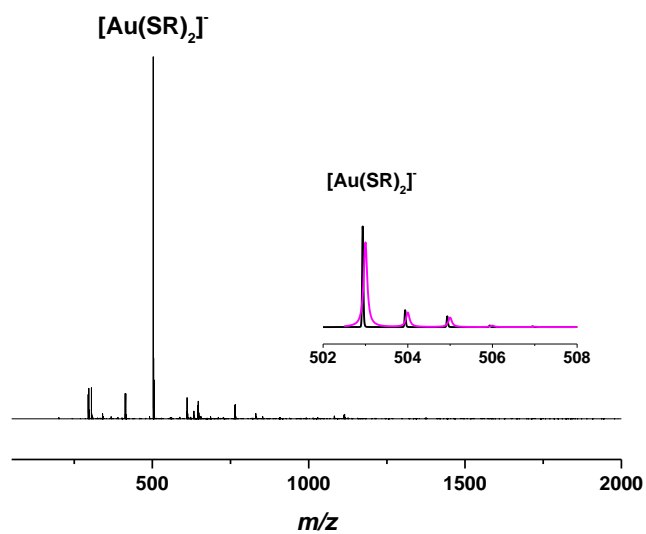

**Supplementary Figure 17.** Electrospray ionization mass spectrum of Au(I)-SR complex by-product observed in surface motif exchange reaction. The inset shows experimental (black line) and simulated (magenta line) isotope patterns of  $[\text{Au}(\text{SR})_2]^-$ .

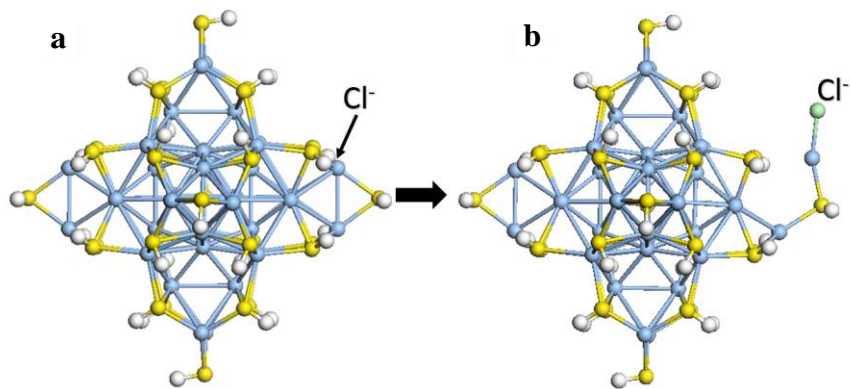

**Supplementary Figure 18. Schematic illustration of cleavage of surface Ag-S bond in  $[\text{Ag}_{44}(\text{SR})_{30}]^{4+}$  induced by  $\text{Cl}^-$ .** (a) Initiation of the motif exchange by  $\text{Cl}^-$  ion absorption, and (b) subsequent geometric relaxation and Ag-S bond cleavage induced by bonding of the  $\text{Cl}^-$  to the Ag atom. For ease of computation, the  $-\text{SR}$  is simplified as  $-\text{SH}$ .

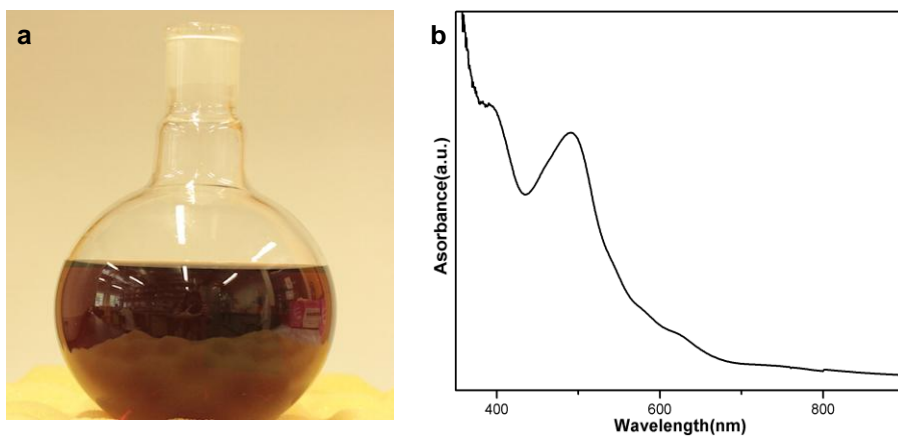

**Supplementary Figure 19.** (a) Digital image and (b) ultraviolet-visible absorption spectrum of  $[\text{Ag}_{32}\text{Au}_{12}(\text{SR})_{30-b}\text{Cl}_b]^{4-}$  NCs ( $b = 0-2$ ) synthesized at large quantity (volume of flask = 100 mL).

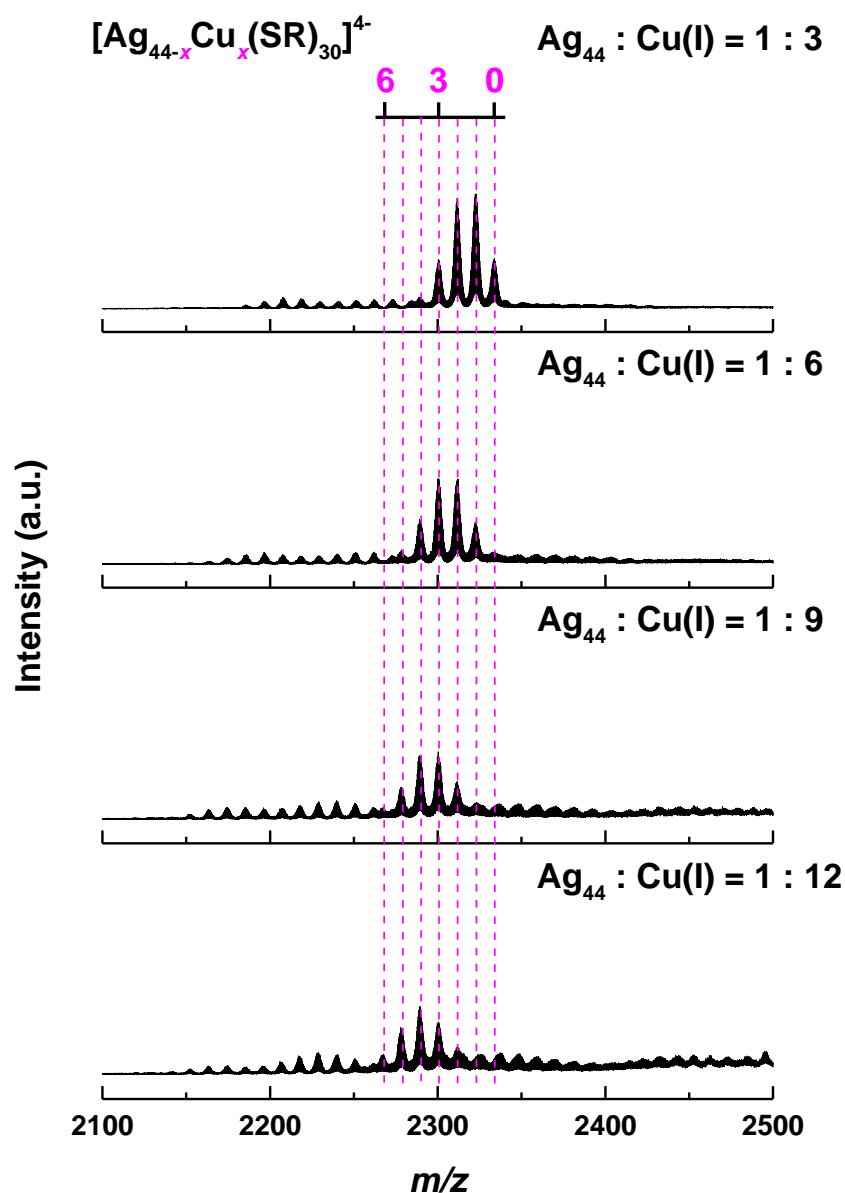

**Supplementary Figure 20. Reaction of Ag<sub>44</sub> nanoclusters with varied dose of Cu(I)-SR complexes.** Electrospray ionization mass spectra of  $[\text{Ag}_{44-x}\text{Cu}_x(\text{SR})_{30}]^{4-}$  NCs synthesized at varied feeding ratios of Ag<sub>44</sub>-to-Cu(I),  $R_{\text{Ag}_{44}/\text{Cu(I)}}$ . The dotted lines indicate the number of Cu heteroatoms in each cluster.

## Supplementary References

1. Yao, Q., *et al.* Counterion-assisted shaping of nanocluster supracrystals. *Angew. Chem. Int. Ed.* **54**, 184-189 (2015).
2. Desireddy, A., *et al.* Ultrastable silver nanoparticles. *Nature* **501**, 399-402 (2013).
